# Supplementary material
Source: MDPI journal article supplement (https://www.mdpi.com/1999-4907/7/5/94)
Supplement: s1 [file s1]

Supplementary Materials: Forecasting monthly prices of Japanese logs

Tetsuya Michinaka, Hirofumi Kuboyama, Kazuya Tamur, Hiroyasu Oka and Nobuyuki Yamamoto

Valuations of forecasting errors by ETS and ARIMA for sugi, hinoki, and karamatsu were made and their results for 6 months ahead and 12 months ahead were shown in the paper. In this section, the valuations for other months are shown. As there is no difference between ETS and ARIMA forecasts for karamatsu, valuations for karamatsu forecasts were omitted. Because when MAE or MAPE were small, RMSE is also small in comparing the errors among Snaïve, ETS, and ARIMA forecasts, only the results for RMSE are shown in the following tables.

**Table S1.** Valuations of one-month-ahead forecasts for *sugi* and *hinoki*. Smallest errors are shown in bold letters.

| **Valuation** | ***Sugi*** | | | ***Hinoki*** | | |
| --- | --- | --- | --- | --- | --- | --- |
| **Snaïve** | **ETS** | **ARIMA** | **Snaïve** | **ETS** | **ARIMA** |
| 1 | 294 | **67** | 311 | **94** | 160 | 293 |
| 2 | **281** | 716 | 586 | 688 | 145 | **7** |
| 3 | 372 | 190 | **17** | 1063 | **224** | 289 |
| 4 | 473 | **9** | 120 | 1486 | **26** | 238 |
| 5 | 594 | 228 | **146** | 1620 | 112 | **112** |
| 6 | 409 | 173 | **95** | 2484 | 433 | **244** |
| 7 | **85** | 303 | 122 | 3911 | 380 | **155** |
| 8 | **50** | 301 | 415 | 6293 | 276 | **133** |
| 9 | 719 | **182** | 361 | 7041 | 486 | **285** |
| 10 | 1021 | 190 | **41** | 7322 | 180 | **81** |

**Table S2.** Valuations of two-months-ahead forecasts for *sugi* and *hinoki*.

| **Valuation** | ***Sugi*** | | | ***Hinoki*** | | |
| --- | --- | --- | --- | --- | --- | --- |
| **Snaïve** | **ETS** | **ARIMA** | **Snaïve** | **ETS** | **ARIMA** |
| 1 | **288** | 674 | 573 | 491 | **102** | 214 |
| 2 | **330** | 656 | 432 | 895 | **324** | 343 |
| 3 | 426 | **142** | 162 | 1292 | 175 | **170** |
| 4 | 537 | 223 | **124** | 1554 | **101** | 288 |
| 5 | 510 | 309 | **214** | 2097 | 486 | **361** |
| 6 | 295 | 398 | **212** | 3276 | 631 | **112** |
| 7 | **70** | 476 | 593 | 5239 | 524 | **260** |
| 8 | 510 | **154** | 272 | 6677 | 631 | **277** |
| 9 | 883 | **135** | 299 | 7183 | **247** | 284 |
| 10 | 722 | **429** | 485 | 6099 | 232 | **162** |

**Table S3.** Valuations of three-months-ahead forecasts for *sugi* and *hinoki*.

| **Valuation** | ***Sugi*** | | | ***Hinoki*** | | |
| --- | --- | --- | --- | --- | --- | --- |
| **Snaïve** | **ETS** | **ARIMA** | **Snaïve** | **ETS** | **ARIMA** |
| 1 | **318** | 715 | 487 | 733 | 311 | **289** |
| 2 | **383** | 542 | 473 | 1127 | 282 | **141** |
| 3 | 488 | 183 | **102** | 1410 | **110** | 262 |
| 4 | 498 | 339 | **221** | 1915 | **508** | 523 |
| 5 | 419 | 520 | **318** | 2834 | 754 | **156** |
| 6 | **243** | 593 | 696 | 4512 | 794 | **235** |
| 7 | 419 | 275 | **249** | 5901 | 847 | **233** |
| 8 | 722 | **210** | 268 | 6899 | 387 | **320** |
| 9 | 721 | **399** | 409 | 6428 | **206** | 335 |
| 10 | 1122 | **229** | 581 | 5196 | **327** | 538 |

**Table S4.** Valuations of four-months-ahead forecasts for *sugi* and *hinoki*.

| **Valuation** | ***Sugi*** | | | ***Hinoki*** | | |
| --- | --- | --- | --- | --- | --- | --- |
| **Snaïve** | **ETS** | **ARIMA** | **Snaïve** | **ETS** | **ARIMA** |
| 1 | **363** | 627 | 553 | 977 | 289 | **163** |
| 2 | 446 | 380 | **310** | 1268 | **176** | 234 |
| 3 | 470 | 310 | **204** | 1742 | **476** | 530 |
| 4 | 433 | 569 | **338** | 2564 | 826 | **297** |
| 5 | **364** | 718 | 785 | 3990 | 962 | **204** |
| 6 | 417 | 381 | **288** | 5259 | 1098 | **242** |
| 7 | 626 | 356 | **243** | 6287 | 604 | **295** |
| 8 | 625 | 469 | **386** | 6395 | **262** | 388 |
| 9 | 1036 | **212** | 539 | 5713 | **285** | 476 |
| 10 | 1381 | 494 | **437** | 4579 | 550 | **549** |

**Table S5.** Valuations of five-months-ahead forecasts for *sugi* and *hinoki*.

| **Valuation** | ***Sugi*** | | | ***Hinoki*** | | |
| --- | --- | --- | --- | --- | --- | --- |
| **Snaïve** | **ETS** | **ARIMA** | **Snaïve** | **ETS** | **ARIMA** |
| 1 | 420 | 434 | **375** | 1135 | **175** | 266 |
| 2 | 438 | 361 | **281** | 1588 | **437** | 515 |
| 3 | 422 | 556 | **330** | 2342 | 832 | **305** |
| 4 | **388** | 782 | 814 | 3630 | 1074 | **237** |
| 5 | 458 | 502 | **352** | 4760 | 1273 | **294** |
| 6 | 589 | 474 | **262** | 5732 | 859 | **309** |
| 7 | 560 | 592 | **437** | 5981 | 423 | **376** |
| 8 | 927 | **277** | 530 | 5834 | **264** | 434 |
| 9 | 1277 | 474 | **425** | 5166 | 530 | **508** |
| 10 | 1399 | 500 | **456** | 4125 | 805 | **661** |

**Table S6.** Valuations of seven-months-ahead forecasts for *sugi* and *hinoki*.

| **Valuation** | ***Sugi*** | | | ***Hinoki*** | | |
| --- | --- | --- | --- | --- | --- | --- |
| **Snaïve** | **ETS** | **ARIMA** | **Snaïve** | **ETS** | **ARIMA** |
| 1 | 388 | 481 | **323** | 1997 | 826 | **332** |
| 2 | **372** | 728 | 759 | 3105 | 1130 | **211** |
| 3 | 449 | 578 | **371** | 4081 | 1445 | **425** |
| 4 | 575 | 680 | **326** | 4915 | 1174 | **453** |
| 5 | **546** | 832 | 595 | 5178 | 786 | **438** |
| 6 | 799 | **512** | 650 | 5232 | 467 | **396** |
| 7 | 1080 | 412 | **373** | 5187 | **460** | 472 |
| 8 | 1213 | 458 | **440** | 4989 | 771 | **612** |
| 9 | 1328 | 586 | **397** | 4391 | **1103** | 1668 |
| 10 | 1423 | 444 | **440** | 3493 | 2803 | **1136** |

**Table S7.** Valuations of eight-months-ahead forecasts for *sugi* and *hinoki*.

| **Valuation** | ***Sugi*** | | | ***Hinoki*** | | |
| --- | --- | --- | --- | --- | --- | --- |
| **Snaïve** | **ETS** | **ARIMA** | **Snaïve** | **ETS** | **ARIMA** |
| 1 | **364** | 683 | 714 | 2905 | 1165 | **230** |
| 2 | 431 | 541 | **357** | 3826 | 1468 | **427** |
| 3 | 554 | 701 | **325** | 4613 | 1243 | **476** |
| 4 | **538** | 916 | 636 | 4872 | 902 | **524** |
| 5 | 776 | **636** | 727 | 4928 | 577 | **371** |
| 6 | 1020 | 412 | **357** | 4931 | 463 | **450** |
| 7 | 1135 | 433 | **412** | 4867 | 728 | **610** |
| 8 | 1243 | 558 | **386** | 4671 | **1182** | 1655 |
| 9 | 1355 | 458 | **452** | 4108 | 3034 | **1140** |
| 10 | 1463 | 384 | **305** | 3269 | 3419 | **1392** |

**Table S8.** Valuations of nine-months-ahead forecasts for *sugi* and *hinoki*.

| **Valuation** | ***Sugi*** | | | ***Hinoki*** | | |
| --- | --- | --- | --- | --- | --- | --- |
| **Snaïve** | **ETS** | **ARIMA** | **Snaïve** | **ETS** | **ARIMA** |
| 1 | 418 | 510 | **343** | 3607 | 1507 | **461** |
| 2 | 530 | 662 | **321** | 4355 | 1284 | **480** |
| 3 | **522** | 945 | 653 | 4607 | 963 | **548** |
| 4 | 749 | **718** | 770 | 4672 | 668 | **371** |
| 5 | 982 | 446 | **360** | 4680 | 478 | **424** |
| 6 | 1079 | 425 | **392** | 4663 | 687 | **590** |
| 7 | 1172 | 526 | **364** | 4593 | **1203** | 1663 |
| 8 | 1277 | **435** | 448 | 4404 | 3221 | **1141** |
| 9 | 1400 | 399 | **307** | 3874 | 3688 | **1407** |
| 10 | 1508 | 456 | **326** | 3102 | 2565 | **1523** |

**Table S9.** Valuations of 10-months-ahead forecasts for *sugi* and *hinoki*.

| **Valuation** | ***Sugi*** | | | ***Hinoki*** | | |
| --- | --- | --- | --- | --- | --- | --- |
| **Snaïve** | **ETS** | **ARIMA** | **Snaïve** | **ETS** | **ARIMA** |
| 1 | 512 | 630 | **315** | 4132 | 1340 | **512** |
| 2 | **503** | 907 | 622 | 4376 | 997 | **553** |
| 3 | **720** | 747 | 791 | 4445 | 712 | **356** |
| 4 | 944 | 471 | **355** | 4465 | 499 | **414** |
| 5 | 1041 | 444 | **384** | 4453 | 653 | **562** |
| 6 | 1119 | 504 | **350** | 4427 | **1205** | 1650 |
| 7 | 1212 | **415** | 427 | 4358 | 3340 | **1160** |
| 8 | 1328 | 380 | **299** | 4179 | 3910 | **1416** |
| 9 | 1449 | 480 | **336** | 3690 | 2636 | **1546** |
| 10 | 1536 | **393** | 488 | **3040** | 6227 | 3913 |

**Table S10.** Valuations of 11-months-ahead forecasts for *sugi* and *hinoki*.

| **Valuation** | ***Sugi*** | | | ***Hinoki*** | | |
| --- | --- | --- | --- | --- | --- | --- |
| **Snaïve** | **ETS** | **ARIMA** | **Snaïve** | **ETS** | **ARIMA** |
| 1 | **488** | 877 | 598 | 4172 | 1044 | **584** |
| 2 | **692** | 716 | 762 | 4243 | 733 | **341** |
| 3 | 907 | 468 | **345** | 4269 | 500 | **396** |
| 4 | 1002 | 459 | **372** | 4270 | 626 | **538** |
| 5 | 1082 | 500 | **349** | 4250 | **1183** | 1622 |
| 6 | 1162 | 410 | **407** | 4222 | 3425 | **1158** |
| 7 | 1266 | 369 | **286** | 4156 | 4063 | **1440** |
| 8 | 1381 | 464 | **333** | 3997 | 2685 | **1562** |
| 9 | 1481 | **405** | 508 | **3593** | 6397 | 3982 |
| 10 | 1626 | 1730 | **802** | **3313** | 7666 | 4451 |
